# Supplementary material for: Cyclodextrins: a new and effective class of co-modulators for aqueous zirconium-MOF syntheses
Source: Royal Society of Chemistry journal article supplement (doi:10.1039/d1ce00128k), 2021-01-01
Supplement: d1ce00128k1.pdf [file d1ce00128k1.pdf]

## Electronic Supplementary Information

### **Cyclodextrins: a New and Effective Class of Co-Modulators for Aqueous Zirconium-MOF Syntheses**

Guillaume Hoyez,<sup>a</sup> Jolanta Rousseau,<sup>a</sup> Cyril Rousseau,<sup>a</sup> Sébastien Saitzek,<sup>a</sup> James King,<sup>b</sup> Petra Agota Szilagyi,<sup>b</sup> Christophe Volkringer,<sup>c</sup> Thierry Loiseau,<sup>c</sup> Frédéric Hapiot,<sup>a</sup> Eric Monflier,<sup>a</sup> and Anne Ponchel,<sup>a,\*</sup>

a. Univ. Artois, CNRS, Centrale Lille, Univ. Lille, UMR 8181 – UCCS – Unité de Catalyse et Chimie du Solide, F-62300 Lens, France.

b. Queen Mary University of London, School of Engineering and Materials Science, Mile End Road, E1 4NS London, UK.

c. Univ. Lille, CNRS, Centrale Lille, Univ. Artois, UMR 8181 – UCCS – Unité de Catalyse et Chimie du Solide, F-59000 Lille, France.

## Materials and methods

### Chemicals

All solvents and reagents were purchased from commercial vendors and used as received. Zirconium (IV) oxychloride octahydrate ( $\text{ZrOCl}_2 \cdot 8\text{H}_2\text{O}$ , 99,5%), *N,N*-dimethylformamide (DMF, 99,8%) were purchased from Sigma Aldrich, Germany and USA. 2-aminoterephthalic acid ( $\text{H}_2\text{BDC-NH}_2$ , 99%) was bought from Acros Organics, New Jersey, USA - Strem Chemicals, USA; acetic acid ( $\text{CH}_3\text{COOH}$ , 99,7%) – Fisher Scientific; methanol ( $\text{CH}_3\text{OH}$ , 99,9%) - Verbieste, France; ethanol ( $\text{C}_2\text{H}_5\text{OH}$ , 99%).

### Grinding under ball-milling conditions

The experiments were conducted using a laboratory-scale ball-mill (Retsch MM400) equipped with 10 mL zirconia grinding jars containing a zirconia ball (9 mm  $\varnothing$ ). The grinding jars were horizontally shaken at an oscillation frequency of 30 Hz (frequency of the rocking back-and-forth motion conducted by the reaction jar holder).

### Fourier-transform infrared spectroscopy (FTIR)

Infrared experiments were performed using a Spectrum two Elmer FT-IR spectrometer equipped with a single-reflection diamond module (ATR) and a deuterated triglycine sulfate detector (DGTS) (MCT) detector. FTIR spectra were recorded in the 400–4000  $\text{cm}^{-1}$  wavenumber range with a 1  $\text{cm}^{-1}$  resolution.

### Diffraction

X-Ray Diffraction (XRD) measurements were performed using a Rigaku ULTIMA IV diffractometer equipped with Cu anticathode ( $\lambda_{\text{K}\alpha} = 1.5418 \text{ \AA}$ ), Soller slits to limit the divergence of X-ray beam and a nickel foil filter attenuates the Cu  $\text{K}\beta$  line. XRD patterns were recorded in the range of 3°–50° (scan speed of 0. 400°.min<sup>-1</sup>) using the Bragg-Brentano configuration. The average crystallite size was determined using Scherrer's relation<sup>1</sup> by deconvoluting the instrumental part in the Full Width at Half Maximum (FWHM).

### Thermogravimetric measurements (TGA) and differential Scanning Calorimetry (DSC)

TG analysis was performed using a Mettler Toledo TGA/DSC 3+ Start System instrument equipped with a flow gas system. The solid was treated from 40 °C to 1000 °C (5 °C.min<sup>-1</sup>) under air (50 mL.min<sup>-1</sup>).

### Nitrogen Adsorption–Desorption

$\text{N}_2$  sorption isotherms were collected at -196 °C using an adsorption analyzer Micromeritics Tristar II 3020. Prior to analysis, 80 – 100 mg of a freshly dried sample (100 °C, overnight) was degassed for 2 hours at 100 °C under vacuum. For the surface areas estimation, Langmuir and Brunauer-Emmett-Teller (BET) models were applied to fit the experimental data.

---

<sup>1</sup> A. Patterson, *Phys. Rev.* **1939**, 56, 978–982.

The Langmuir model assumes that the maximum adsorption corresponds to a monolayer of adsorbate molecules on a homogeneous surface (i.e. with a constant energy). The equation in its linear form can be expressed as follows:

$$\frac{P}{V} = \frac{1}{K_L \cdot V_m} + \frac{P}{V_m}$$

where  $V$  and  $V_m$  are the equilibrium and maximum capacity of  $N_2$  adsorption ( $\text{cm}^3 \text{g}^{-1}$ ), respectively,  $K_L$  is the Langmuir adsorption constant and  $P$  is the pressure at the equilibrium of the  $N_2$  adsorbed gas. The value of  $V_m$  is extracted from the slope ( $1/V_m$ ) of the linear plot of ( $P/V$ ) vs.  $P$ .

Langmuir surface areas were calculated employing data points in the range of relative pressure ( $P/P^\circ$ ) from 0.0001 to 0.7

The equation of the BET theory is based on multilayer adsorption and can be written as follows:

$$\frac{\frac{P}{P^\circ}}{V(1 - \frac{P}{P^\circ})} = \frac{1}{V_m \cdot C} + \frac{C - 1}{V_m \cdot C} \cdot \frac{P}{P^\circ}$$

where  $V$  and  $V_m$  are the equilibrium and maximum capacity of  $N_2$  adsorption ( $\text{cm}^3 \text{g}^{-1}$ ),  $P/P^\circ$  is the relative pressure and  $C$  is the BET constant. The value of  $V_m$  is extracted from the inverse of the (slope + intercept) of the linear plot of ( $P/P^\circ$ )/( $V(1 - (P/P^\circ))$ ) vs.  $P/P^\circ$

The BET specific surface areas were determined in the  $P/P^\circ$  range from 0.001 to 0.05, identified by applying the four consistency criteria developed by Rouquerol et al.<sup>2</sup>: (i) the BET  $C$  constant should be positive; (ii) the function  $V(1 - (P/P^\circ))$  should continuously increase with  $P/P^\circ$ ; (iii) the monolayer capacity ( $V_m$ ) should correspond to a relative pressure  $P/P^\circ$  included within the selected pressure; (iv) the calculated value for monolayer formation ( $1/(VC + 1)$ ) should be approximately equal to  $P/P^\circ$  at the monolayer formation (a tolerance of 20% has been accepted). In all cases, the four consistency criteria were satisfactorily fulfilled.

The t-plot method was used to estimate the amount of micropores based on the Halsey thickness equation. The total pore volumes were estimated from the adsorbed amounts at a relative pressure of ca. 0.95. Based on the  $N_2$  adsorption data, a nonlocal density functional theory (NLDFT) model included in the commercial Tristar II 3020 V1.03 software was used for the calculation of pore size distributions (assuming cylindrical pore geometry).

## NMR

$^1\text{H}$  NMR spectra were recorded on a 300 MHz Bruker Avance III HD spectrometer using  $\text{D}_2\text{O}$  (99.92% isotopic purity, Eurisotop) as a solvent.

## Field emission scanning electron microscopy (FE-SEM)

<sup>2</sup> J. Rouquerol, P. Llewellyn, F. Rouquerol, *Stud. Surf. Sci. Catal.* **2007**, 160, 40-56

Field emission scanning electron microscopy (FE-SEM) observations were performed to examine the morphology of the samples using a JEOL JSM-7800F LV field-emission microscope operating at 2 or 3 kV. Before imaging, samples were coated with a thin layer of chromium to reduce the accumulation of charges at high magnification.

## Digestion experiments

Digestion experiments were carried out and monitored by  $^1\text{H}$  NMR as follows:  $\text{NH}_2\text{-UiO-66}$  (10 mg) and  $\text{D}_2\text{O}$  (600  $\mu\text{L}$ ) were introduced in a NMR tube. Sodium hydroxide (60 mg) was then added and the resultant solution was placed in an ultrasonic bath at room temperature for 10 s to provoke the MOF digestion. No signal relative to CD was detected.

The MOF structures were determined by liquid  $^1\text{H}$  NMR measurements after sample digestion. From the relative peak area of aromatic  $H_2\text{BDC-NH}_2$  protons and acetic acid methyl protons,  $\text{UiO-66-NH}_2$  were formulated using the following equation:

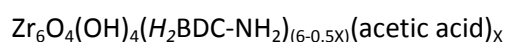

$X = 6R/(1+0.5R)$ , with R the NMR ratio of acetic acid to  $H_2\text{BDC-NH}_2$ .

Maleic acid was used as an internal reference (6.26 ppm) for the degradation under acidic conditions.

<sup>3,4</sup> The first step was to make two standard lines for the linker (2-aminoterephthalic acid) and the modulator (acetic acid) with various concentration ratios between the linker and the modulator with the reference (maleic acid). These lines are plotted considering the ratio of the concentrations as a function of the integrations of the respective peaks with each of the chemical species. Then, with a constant concentration of maleic acid, we proceed to the degradation in acidic environment of MOF  $\text{UiO-66-NH}_2$  (mass of 2 mg for each sample in 120  $\mu\text{L}$  of  $\text{H}_2\text{SO}_4$  then removal of 50  $\mu\text{L}$  of this solution, the tube was completed to 600  $\mu\text{L}$  with  $\text{DMSO-d}_6$ ). Thanks to the ligand and modulator integration ratios with the reference, the ligand and modulator concentrations were determined in each of the digested samples, and the mass and mass fraction of each of the constituents of the MOF as well. The number of ligands and modulators per node Zr were given using the following formula:

$$\text{Number of ligand or modulator (i)} = w_i * M_{\text{MOF}} / M_i$$

$w_i$  = weight fraction of ligand or modulator with respect to the total weight of MOF.

<sup>3</sup> R. Limvorapitux, H. Chen, M. L. Mendonca, M. Liu, R. Q. Snurr, S. T. Nguyen, *Catal. Sci. Technol.*, **2019**, 9, 327-335.

<sup>4</sup> O. V. Gutov, M. González Hevia, E. C. Escudero-Adán, A. Shafir, *Inorg. Chem.* **2015**, 54, 8396-8400.

**Table S1.** MOF formulas obtained from  $^1\text{H}$  NMR at 25 °C in  $\text{CDCl}_3$  (acidic digestion).

| MOF                                              | Formula                                                                                                                            | $H_2\text{BDC}$<br>-NH <sub>2</sub> | CH <sub>3</sub> COO<br>H | Number of<br>free sites | $H_2\text{BDC}$ -<br>NH <sub>2</sub> /Zr |
|--------------------------------------------------|------------------------------------------------------------------------------------------------------------------------------------|-------------------------------------|--------------------------|-------------------------|------------------------------------------|
| Ideal<br>Structure                               | $\text{Zr}_6\text{O}_4(\text{OH})_4(\text{C}_6\text{H}_3\text{NH}_2(\text{COO})_2)_6$                                              | 6                                   | 0                        | 0                       | 1.00                                     |
| UiO-66-NH <sub>2</sub>                           | $\text{Zr}_6\text{O}_4(\text{OH})_{4.02}(\text{C}_6\text{H}_3\text{NH}_2(\text{COO})_2)_{5.95}(\text{CH}_3\text{COOH})_{0.0}$<br>8 | 5.95                                | 0.08                     | 0.02                    | 0.99                                     |
| UiO-66-<br>NH <sub>2</sub> _0.25 $\alpha$ C<br>D | $\text{Zr}_6\text{O}_4(\text{OH})_{5.61}(\text{C}_6\text{H}_3\text{NH}_2(\text{COO})_2)_{5.15}(\text{CH}_3\text{COOH})_{0.0}$<br>8 | 5.15                                | 0.09                     | 1.61                    | 0.86                                     |
| UiO-66-<br>NH <sub>2</sub> _0.50 $\alpha$ C<br>D | $\text{Zr}_6\text{O}_4(\text{OH})_{4.11}(\text{C}_6\text{H}_3\text{NH}_2(\text{COO})_2)_{5.89}(\text{CH}_3\text{COOH})_{0.1}$<br>1 | 5.89                                | 0.11                     | 0.11                    | 0.98                                     |
| UiO-66-<br>NH <sub>2</sub> _0.75 $\alpha$ C<br>D | $\text{Zr}_6\text{O}_4(\text{OH})_{5.76}(\text{C}_6\text{H}_3\text{NH}_2(\text{COO})_2)_{5.08}(\text{CH}_3\text{COOH})_{0.0}$<br>8 | 5.08                                | 0.08                     | 1.76                    | 0.85                                     |
| UiO-66-<br>NH <sub>2</sub> _1 $\alpha$ CD        | $\text{Zr}_6\text{O}_4(\text{OH})_{4.85}(\text{C}_6\text{H}_3\text{NH}_2(\text{COO})_2)_{5.52}(\text{CH}_3\text{COOH})_{0.1}$<br>1 | 5.52                                | 0.11                     | 0.85                    | 0.92                                     |

**Table S2.** Textural characteristics of UiO-66-NH<sub>2</sub> ( $\beta$ -CD as co-modulator).

| $\beta$ -CD<br>(equiv/ligand) | BET SSA<br>(m <sup>2</sup> /g) <sup>a,b</sup> | Langmuir SSA<br>(m <sup>2</sup> /g) <sup>c</sup> | $S_{\text{micro}}$ (m <sup>2</sup> /g) <sup>d</sup> | $S_{\text{micro}} / \text{BET SSA}$<br>(%) | $V_{\text{micro}}$ (cm <sup>3</sup> /g) <sup>e</sup> | $V_{\text{total}}$ (cm <sup>3</sup> /g) <sup>f</sup> | $V_{\text{micro}} / V_{\text{total}}$ (%) | Average pore<br>diameter (Å) <sup>g</sup> |
|-------------------------------|-----------------------------------------------|--------------------------------------------------|-----------------------------------------------------|--------------------------------------------|------------------------------------------------------|------------------------------------------------------|-------------------------------------------|-------------------------------------------|
| 0                             | 611 ± 6                                       | 706 ± 11                                         | 424                                                 | 69.5                                       | 0.144                                                | 0.268                                                | 54.1                                      | 17.7                                      |
| 0.25                          | 973 ± 26                                      | 1089 ± 29                                        | 716                                                 | 73.6                                       | 0.250                                                | 0.402                                                | 62.3                                      | 16.5                                      |
| 0.50                          | 1179 ± 27                                     | 1287 ± 18                                        | 862                                                 | 73.1                                       | 0.300                                                | 0.458                                                | 65.4                                      | 15.5                                      |
| 0.75                          | 939 ± 29                                      | 1048 ± 32                                        | 736                                                 | 78.3                                       | 0.264                                                | 0.375                                                | 70.3                                      | 16.0                                      |
| 1                             | 806 ± 17                                      | 889 ± 22                                         | 652                                                 | 81.0                                       | 0.225                                                | 0.325                                                | 69.1                                      | 16.1                                      |

<sup>a</sup> Average of at least two experiments. <sup>b</sup> Specific surface area calculated from the Brunauer-Emmett-Teller equation in the P/P<sup>o</sup> range from 0.001 to 0.05; <sup>c</sup> Specific surface area calculated from the Langmuir equation in the P/P<sup>o</sup> range from 0.001 to 0.70; <sup>d</sup> Micropore surface area determined by the t-plot method; <sup>e</sup> Micropore volume determined by the t-plot method; <sup>f</sup> Total pore volume estimated at P/P<sup>o</sup> = 0.95; <sup>g</sup> Average pore based on  $4 \times V_{\text{total}} / \text{BET SSA}$

**Table S3.** Textural characteristics of UiO-66-NH<sub>2</sub> ( $\gamma$ -CD as co-modulator).

| $\gamma$ -CD<br>(equiv/ligand) | BET SSA<br>(m <sup>2</sup> /g) <sup>a,b</sup> | Langmuir SSA<br>(m <sup>2</sup> /g) <sup>c</sup> | S <sub>micro</sub> (m <sup>2</sup> /g) <sup>d</sup> | S <sub>micro</sub> / BET SSA<br>(%) | V <sub>micro</sub> (cm <sup>3</sup> /g) <sup>e</sup> | V <sub>total</sub> (cm <sup>3</sup> /g) <sup>f</sup> | V <sub>micro</sub> / V <sub>total</sub> (%) | Average pore<br>diameter (Å) <sup>g</sup> |
|--------------------------------|-----------------------------------------------|--------------------------------------------------|-----------------------------------------------------|-------------------------------------|------------------------------------------------------|------------------------------------------------------|---------------------------------------------|-------------------------------------------|
| 0                              | 611 ± 6                                       | 706 ± 11                                         | 424                                                 | 69.5                                | 0.144                                                | 0.268                                                | 54.1                                        | 17.7                                      |
| 0.25                           | 377 ± 3                                       | 444 ± 22                                         | 268                                                 | 71.3                                | 0.107                                                | 0.187                                                | 59.4                                        | 19.8                                      |
| 0.50                           | 307 ± 11                                      | 358 ± 41                                         | 229                                                 | 74.6                                | 0.080                                                | 0.153                                                | 52.3                                        | 20.1                                      |
| 0.75                           | 149 ± 6                                       | 166 ± 6                                          | 84                                                  | 65.1                                | 0.028                                                | 0.087                                                | 32.0                                        | 27.0                                      |
| 1                              | 39 ± 4                                        | 59 ± 2                                           | 23                                                  | 55.8                                | 0.006                                                | 0.035                                                | 16.6                                        | 34.2                                      |

<sup>a</sup> Average of at least two experiments. <sup>b</sup> Specific surface area calculated from the Brunauer-Emmett-Teller equation in the P/P° range from 0.001 to 0.05; <sup>c</sup> Specific surface area calculated from the Langmuir equation in the P/P° range from 0.001 to 0.70; <sup>d</sup> Micropore surface area determined by the t-plot method; <sup>e</sup> Micropore volume determined by the t-plot method; <sup>f</sup> Total pore volume estimated at P/P° = 0.95; <sup>g</sup> Average pore based on  $4 \times V_{\text{total}} / \text{BET SSA}$ .

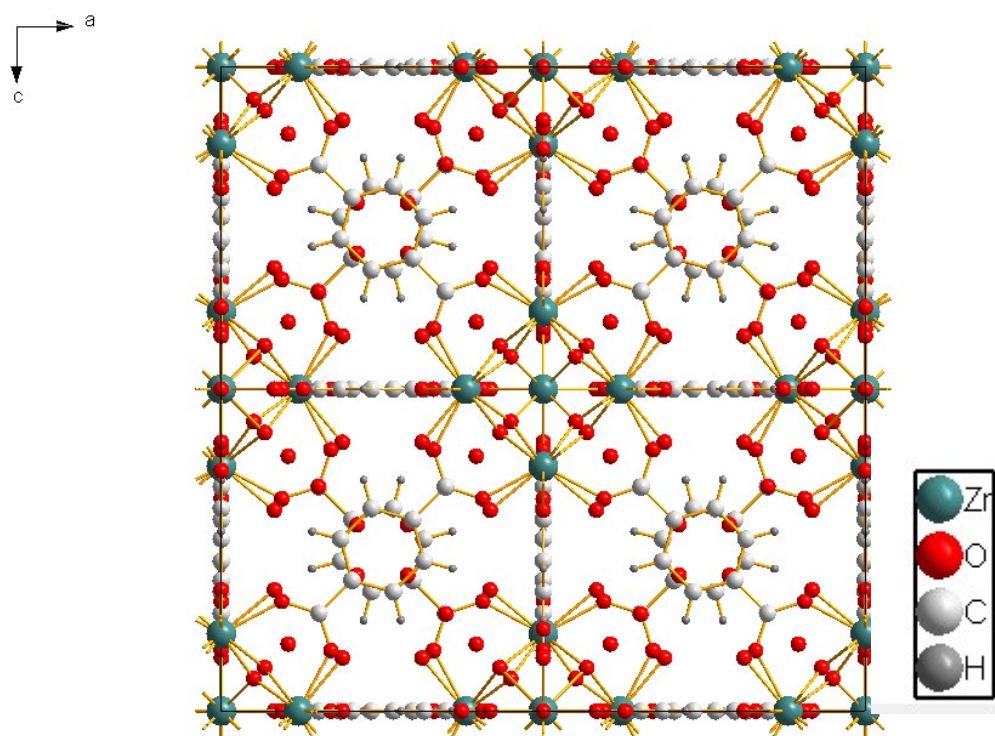

**Figure S1.** Structural representation of the UiO-66-NH<sub>2</sub> arrangement showing Face-Centered-Cubic structure with *Fm-3m* space group. NH<sub>2</sub> groups are omitted for clarity, due to disordered configuration.



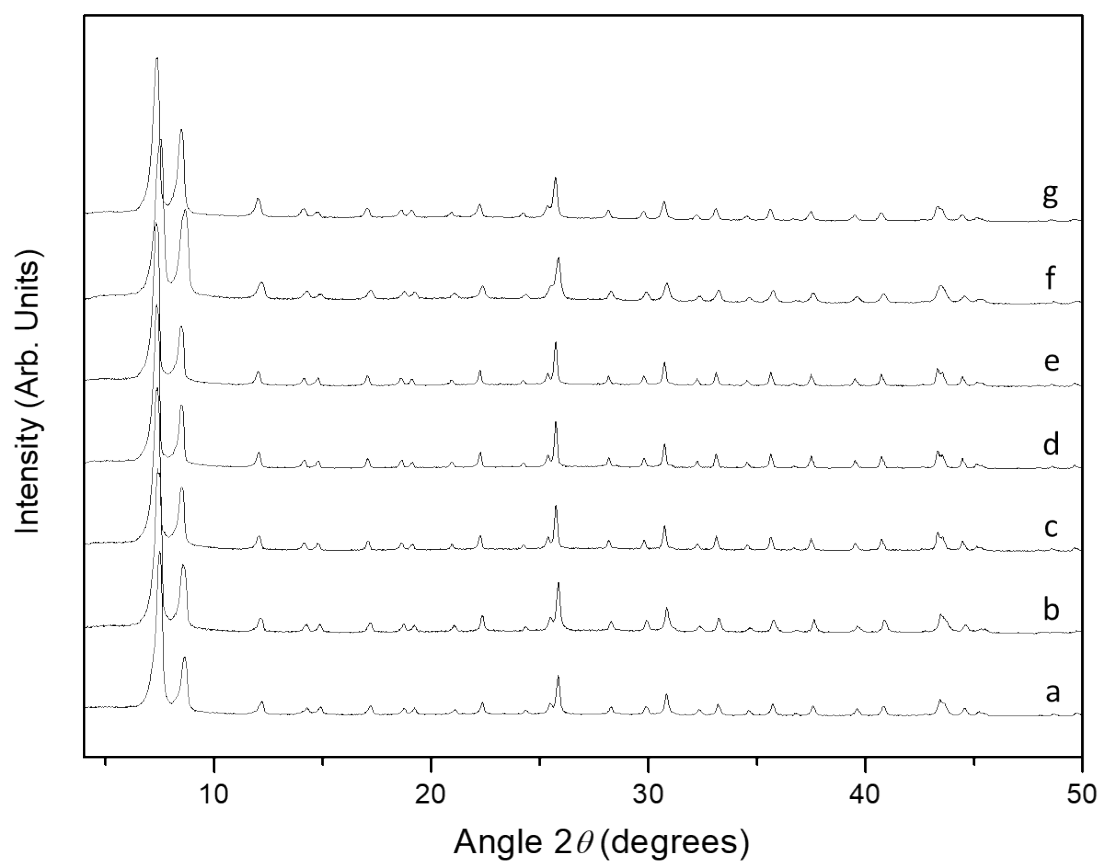

**Figure S2.** XRD patterns of UiO-66-NH<sub>2</sub> derived from mixtures containing  $\alpha$ -CD in various proportions.  $n$  = number of equivalents of  $\alpha$ -CD with respect to the ligand. a)  $n=0$ , b)  $n = 0.05$ , c)  $n=0.10$ , d)  $n=0.25$ , e)  $n=0.5$ , f)  $n=0.75$ , g)  $n=1$ , h)  $n=1.5$ , and i)  $n=2$ .

For the XRD patterns of UiO-66-NH<sub>2</sub> derived from mixtures containing  $\alpha$ -CD, a unique phase is observed and the more intense Bragg peaks are centered at  $2\theta=7.38, 8.52, 17.10, 19.13, 22.27, 25.76, 29.83, 33.17, 35.69, 40.80, 43.63$  and  $49.72^\circ$  indexed with (111), (002), (004), (024), (115), (006), (444), (355), (446), (466), (068) and (088) reflections, respectively.

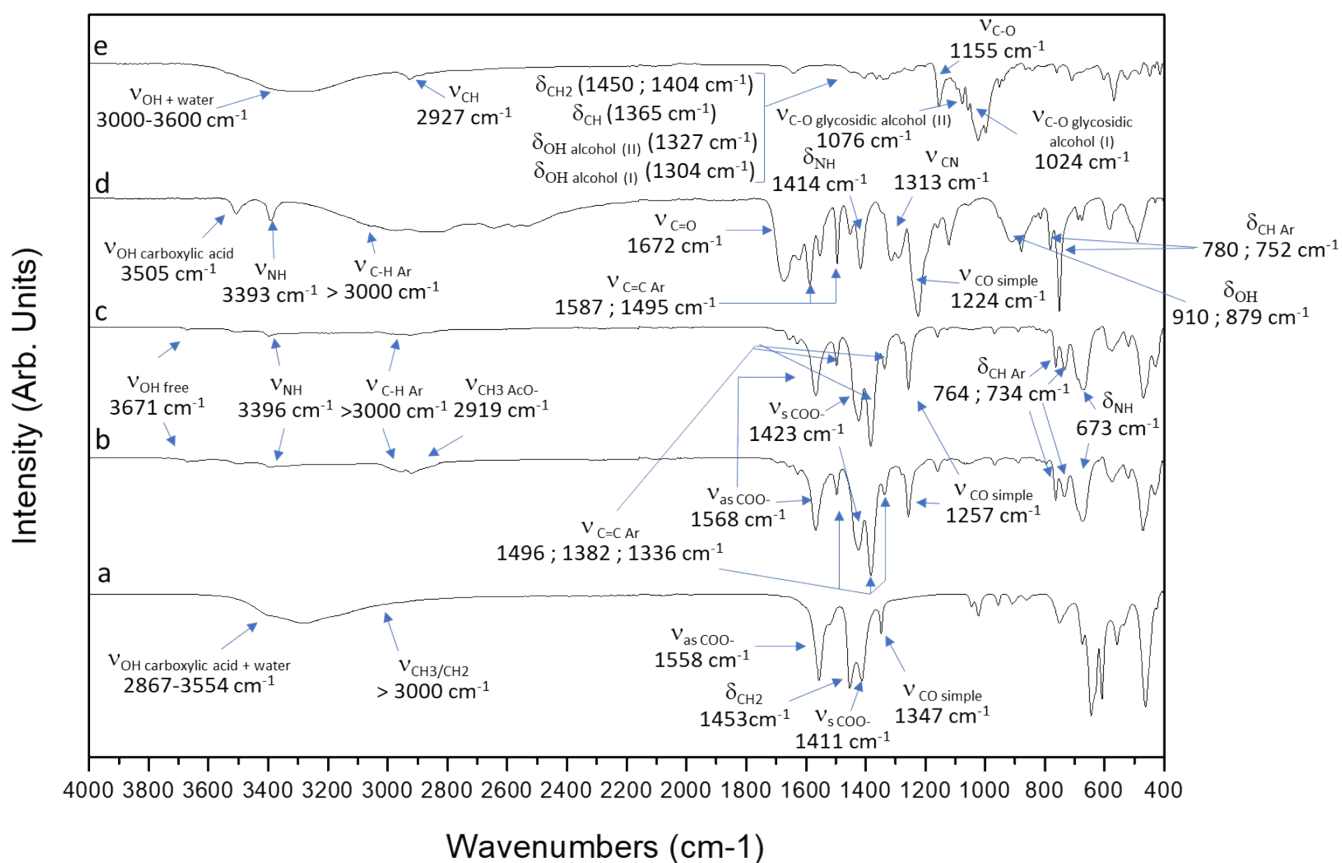

**Figure S3.** FTIR spectra of  $\text{Zr}_6\text{O}_4(\text{OH})_4(\text{CH}_3\text{COO})_{12}$  (a), UiO-66-NH<sub>2</sub> (b), UiO-66-NH<sub>2</sub> synthesized with 1 equivalent  $\alpha$ -CD with respect to the ligand (c), 2-aminoterephthalic acid (d) and  $\alpha$ -CD (e).

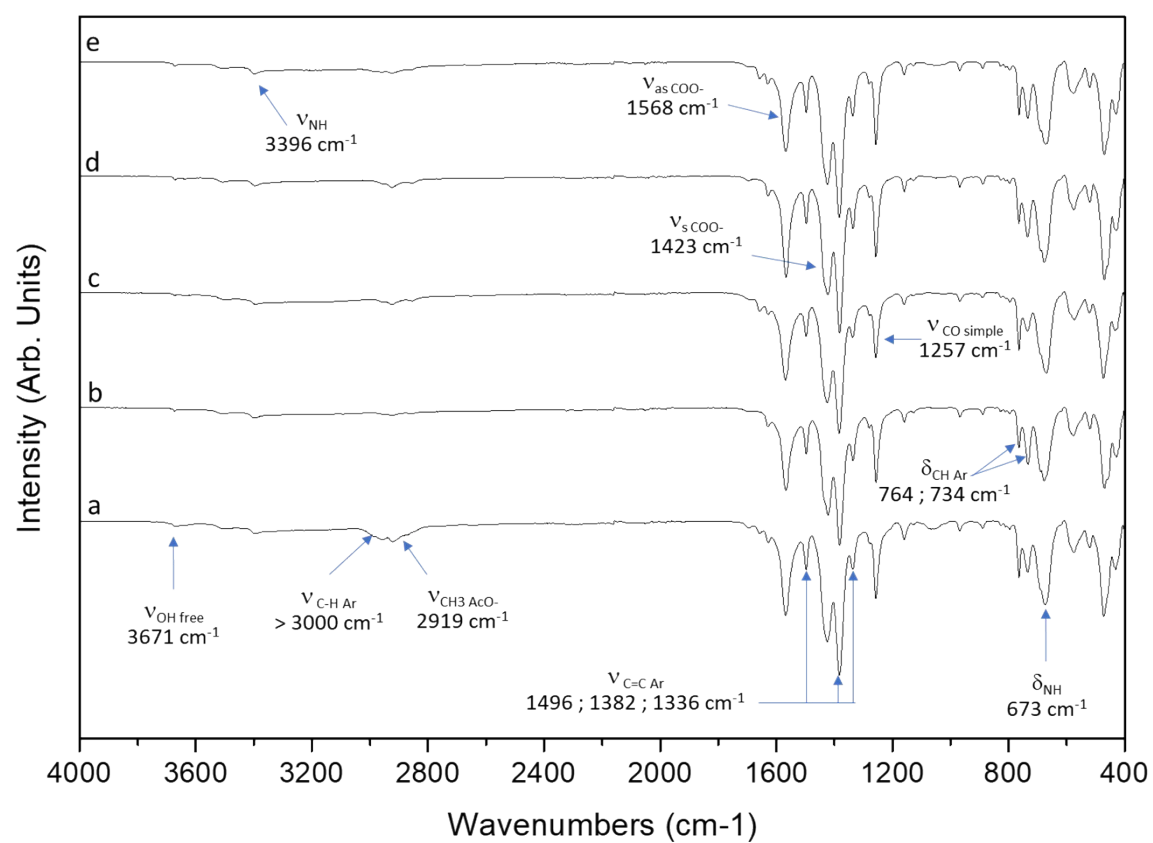

**Figure S4.** FTIR spectra of UiO-66-NH<sub>2</sub> synthesized with  $\alpha$ -CD/ligand molar ratios of 0 (a), 0.25 (b), 0.5 (c), 0.75 (d), and 1 (e).

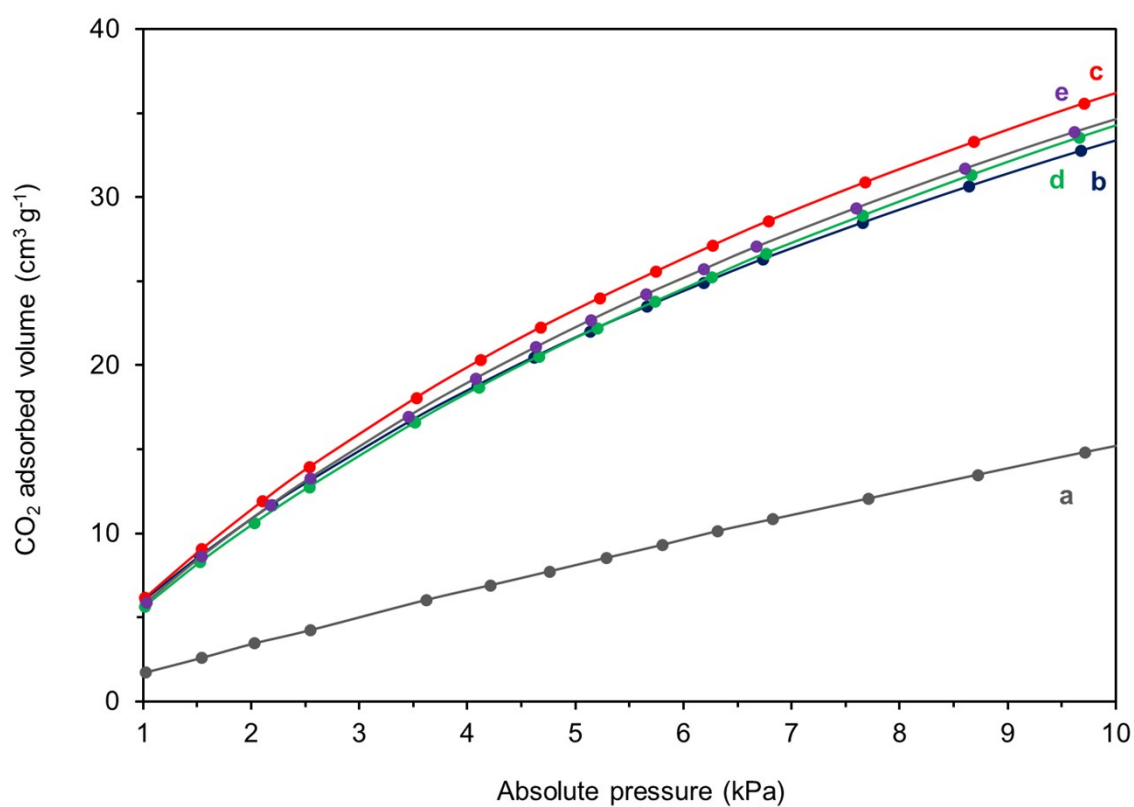

**Figure S5.** CO<sub>2</sub> sorption isotherms collected at 0°C (273 K) of UiO-66-NH<sub>2</sub> synthesized with ground H<sub>2</sub>BDCNH<sub>2</sub> and various amounts of α-CD: 0 equiv/Zr (a, grey), 0.25 equiv/Zr (b, blue), 0.5 equiv/Zr (c, red), 0.75 equiv/Zr (d, green), and 1 equiv/Zr (e, violet).

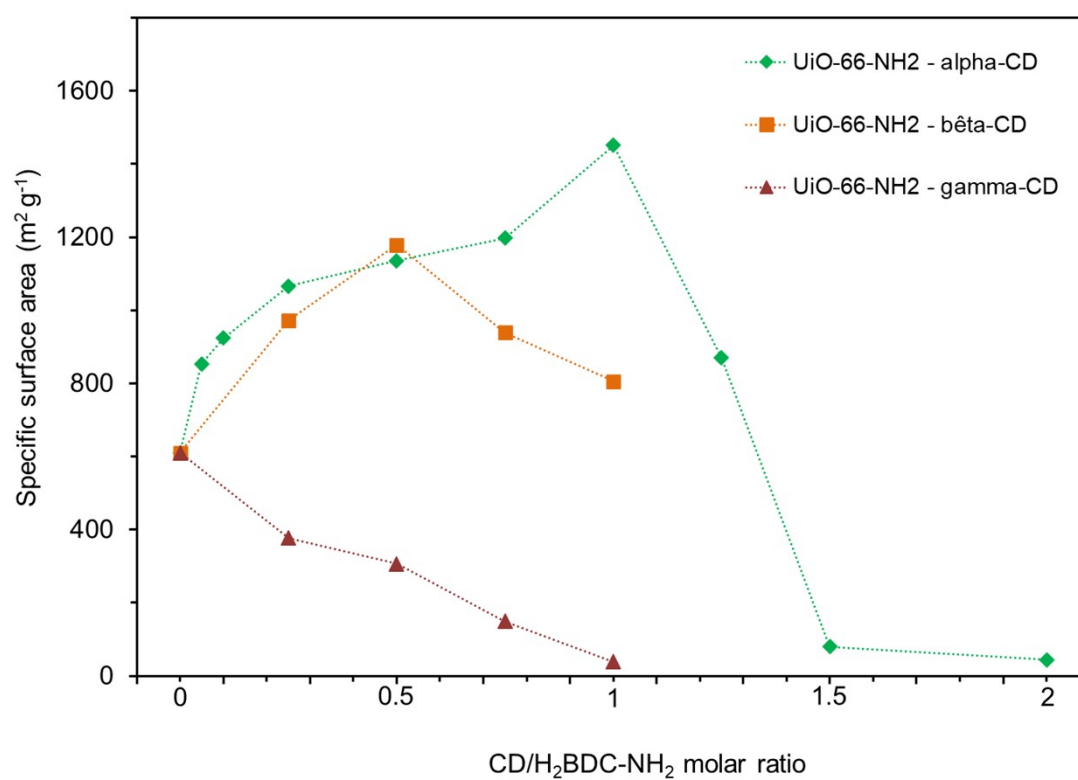

**Figure S6.** Variation of the specific surface area (SSA) measured by BET with the quantity of CD.  $\alpha$ -CD (red);  $\beta$ -CD (black);  $\gamma$ -CD (blue).

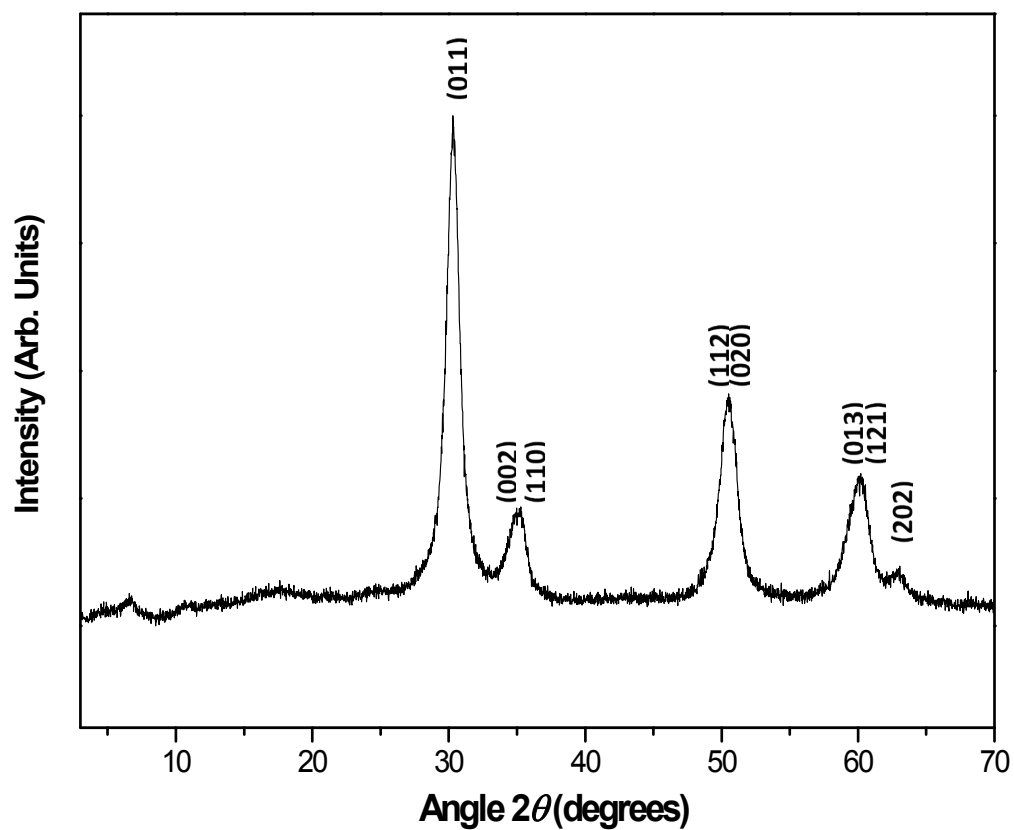

**Figure S7.** XRD pattern of UiO-66-NH<sub>2</sub> after a thermal treatment at 550°C under air flow. The XRD pattern clearly shows the stabilization of the tetragonal phase of ZrO<sub>2</sub> as evidenced by the set of characteristic Bragg reflections (JCPDS card no. 17-0923).

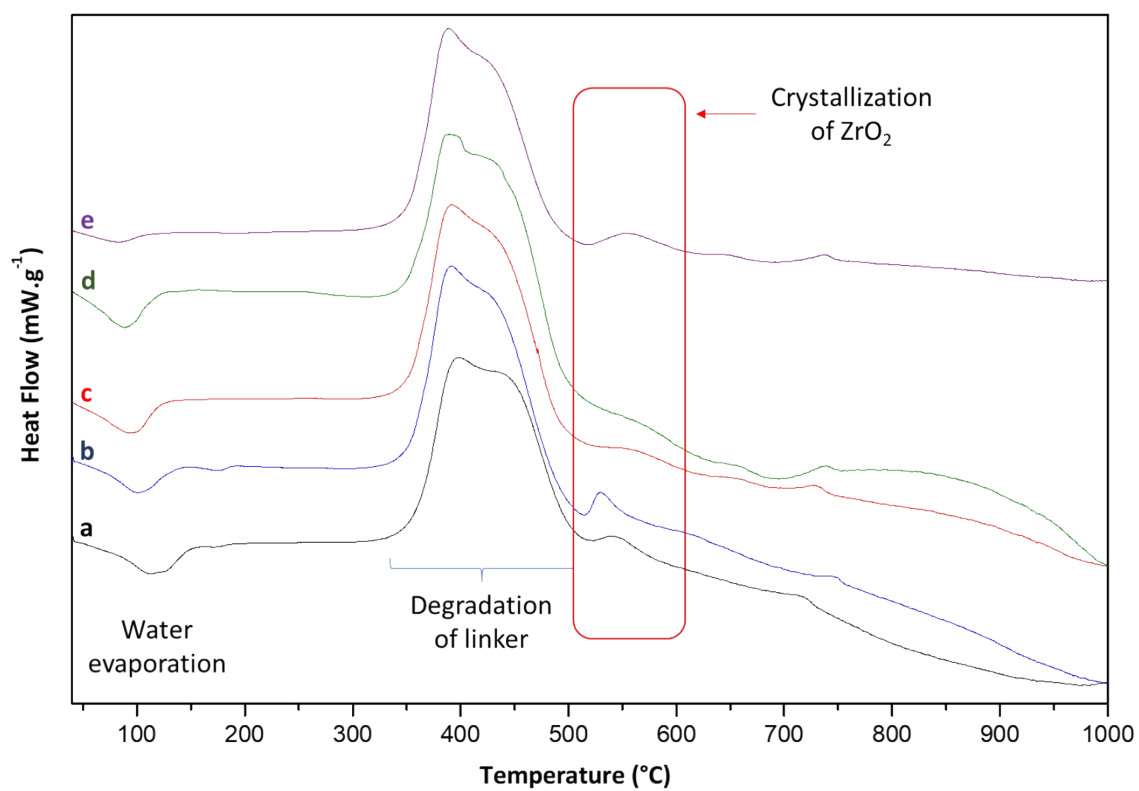

**Figure S8.** Variation of heat flow with the temperature measured by DSC. 0 equiv.  $\alpha$ -CD/ $H_2BDC-NH_2$  (a), 0.25 equiv. (b), 0.5 equiv (c), 0.75 equiv. (d), and 1 equiv. (e).

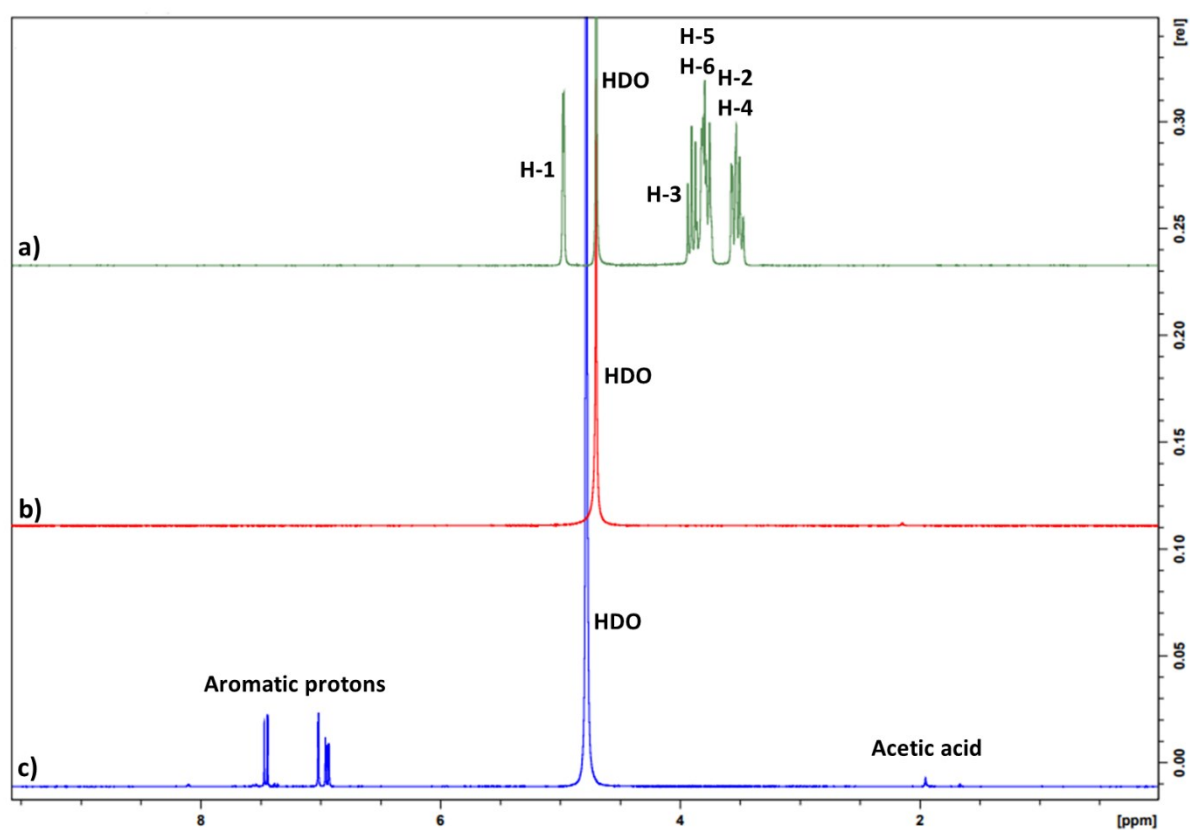

**Figure S9.**  $^1\text{H}$  NMR spectra in  $\text{D}_2\text{O}$  at  $25^\circ\text{C}$  of a)  $\alpha\text{-CD}$ , b)  $\text{UiO-66-NH}_2$  synthesized with  $\alpha\text{-CD}$  as co-modulator, and c) compounds resulting from digestion by NaOH of  $\text{UiO-66-NH}_2$  synthesized with  $\alpha\text{-CD}$  as co-modulator.



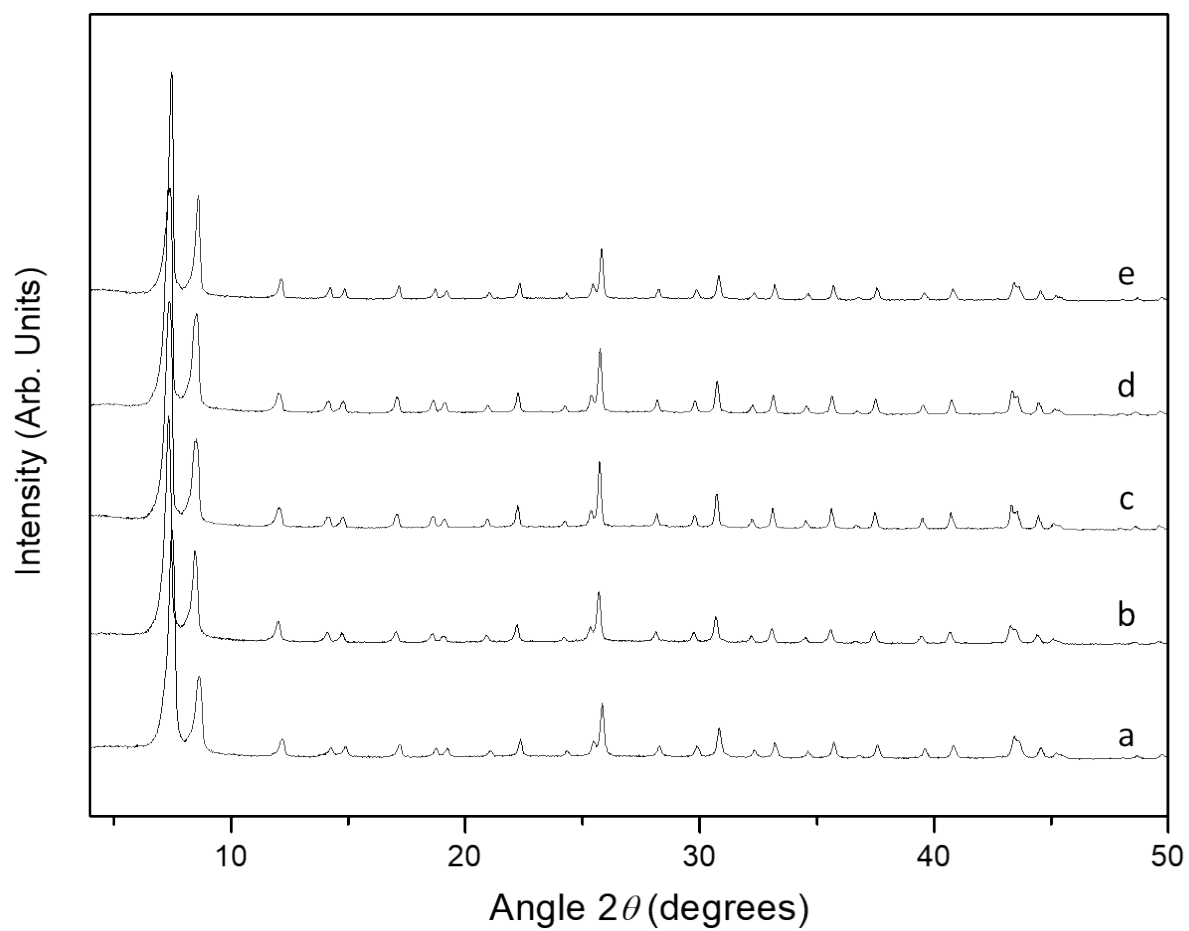

**Figure S10.** XRD patterns of UiO-66-NH<sub>2</sub> derived from mixtures containing β-CD in various proportions. n = number of equivalents of β-CD with respect to the H<sub>2</sub>BDC-NH<sub>2</sub> ligand. a) n=0, b) n=0.25, c) n=0.5, d) n=0.75, and e) n=1.

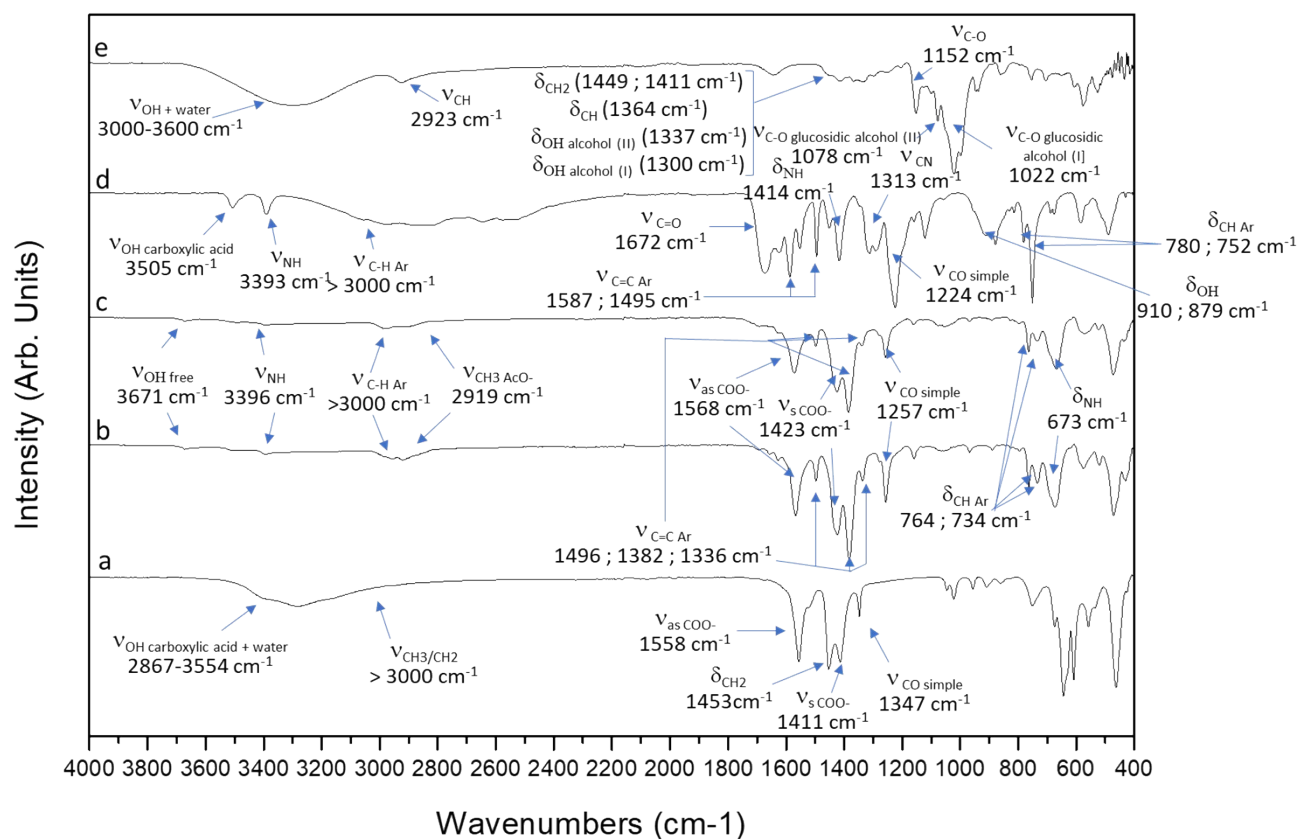

**Figure S11.** FTIR spectra of  $\text{Zr}_6\text{O}_4(\text{OH})_4(\text{CH}_3\text{COO})_{12}$  (a), UiO-66-NH<sub>2</sub> (b), UiO-66-NH<sub>2</sub> synthesized with 1 equivalent  $\beta$ -CD with respect to the ligand (c), 2-aminoterephthalic acid (d) and  $\beta$ -CD (e).

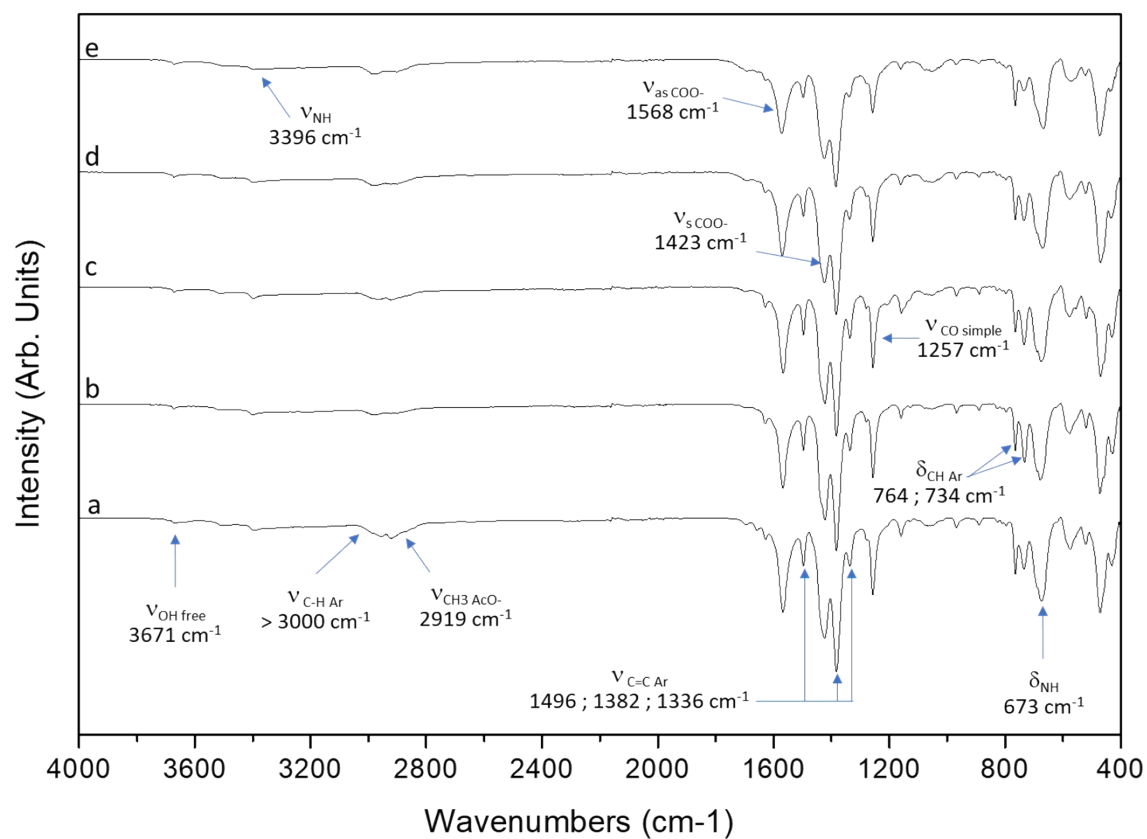

**Figure S12.** FTIR spectra of UiO-66-NH<sub>2</sub> synthesized with  $\beta$ -CD/ligand molar ratios of 0 (a), 0.25 (b), 0.5 (c), 0.75 (d), and 1 (e).

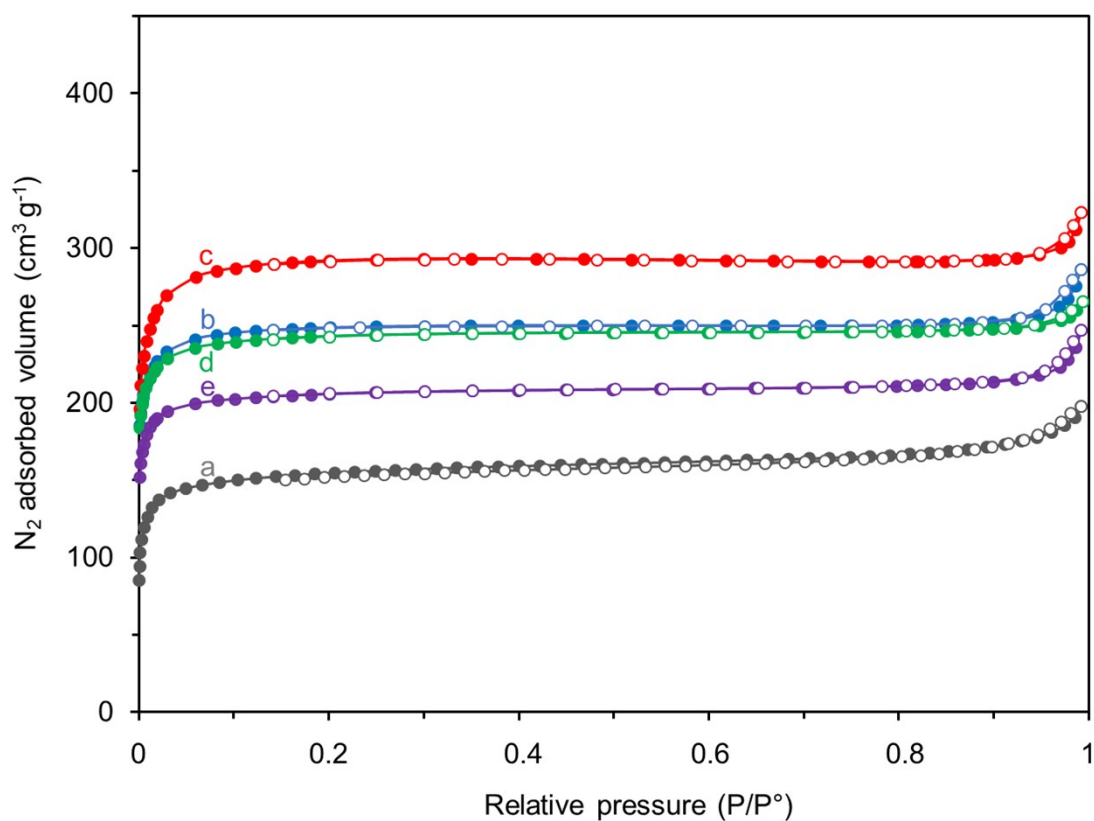

**Figure S13.**  $\text{N}_2$  sorption isotherms collected at 77K of UiO-66- $\text{NH}_2$  synthesized using various amounts of ground  $\beta$ -CD with respect to ground  $\text{H}_2\text{BDC-NH}_2$  [Adsorption (filled circles) and desorption (open circles)]. 0 equiv.  $\alpha$ -CD/  $\text{H}_2\text{BDC-NH}_2$  (a, grey), 0.25 equiv. (b, blue), 0.5 equiv. (c, red), 0.75 equiv. (d, green), and 1 equiv. (e, violet).

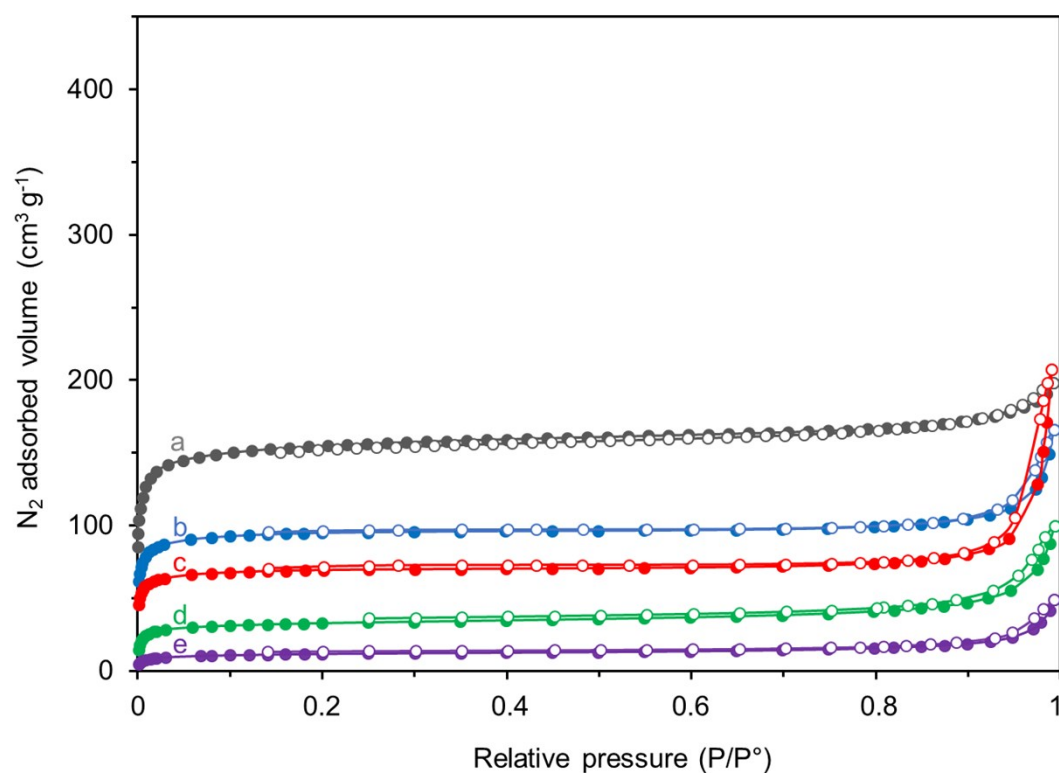

**Figure S14.** N<sub>2</sub> sorption isotherms collected at 77K of UiO-66-NH<sub>2</sub> synthesized using various amounts of ground  $\gamma$ -CD with respect to ground H<sub>2</sub>BDC-NH<sub>2</sub> [Adsorption (filled circles) and desorption (open circles)]. 0 equiv.  $\alpha$ -CD/ H<sub>2</sub>BDC-NH<sub>2</sub> (a, grey), 0.25 equiv. (b, blue), 0.5 equiv. (c, red), 0.75 equiv. (d, green), and 1 equiv. (e, violet).

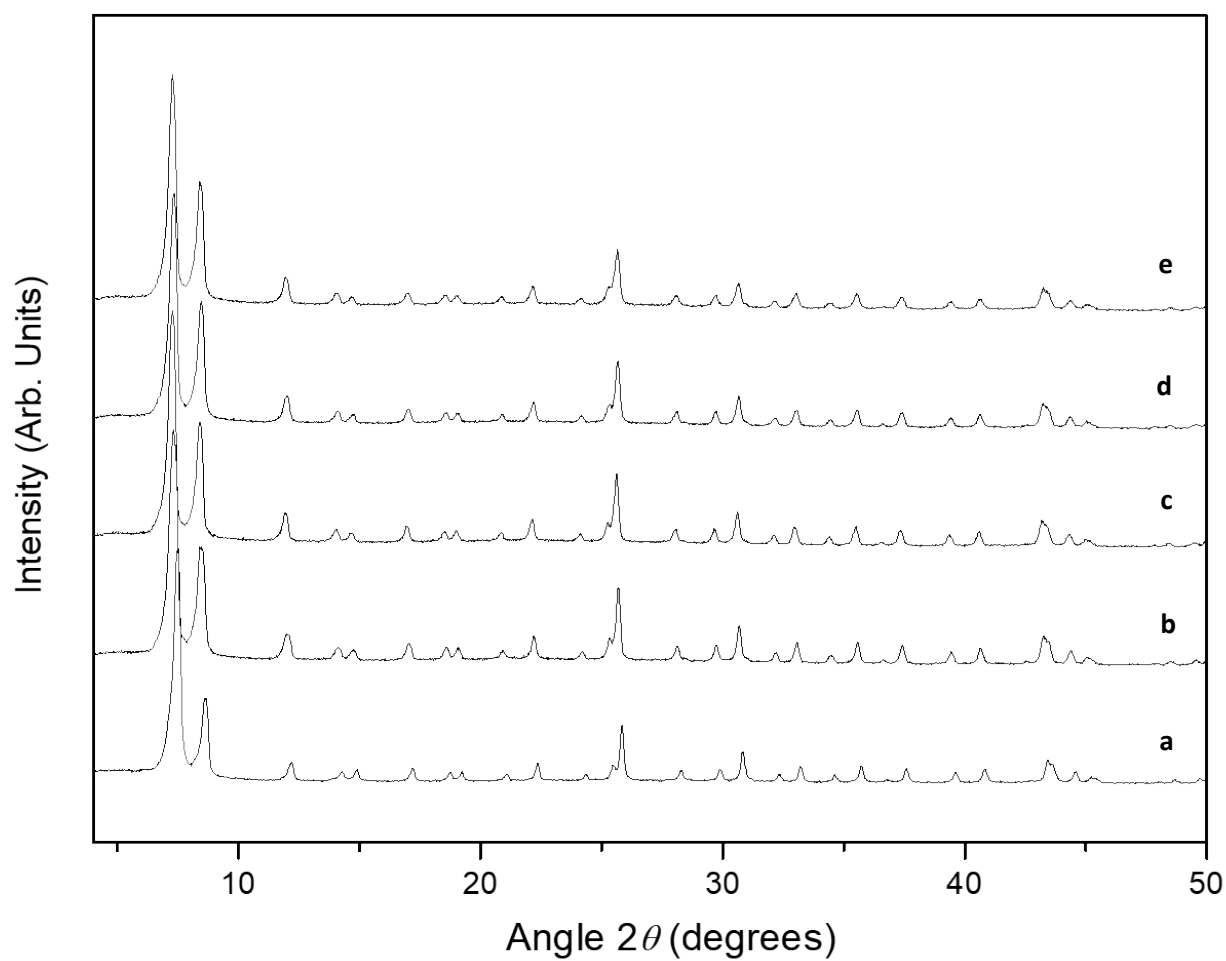

**Figure S15.** XRD patterns of UiO-66-NH<sub>2</sub> derived from mixtures containing γ-CD in various proportions. n = number of equivalents of γ-CD with respect to the H<sub>2</sub>BDC-NH<sub>2</sub> ligand. a) n=0, b) n=0.25, c) n=0.5, d) n=0.75, and e) n=1.

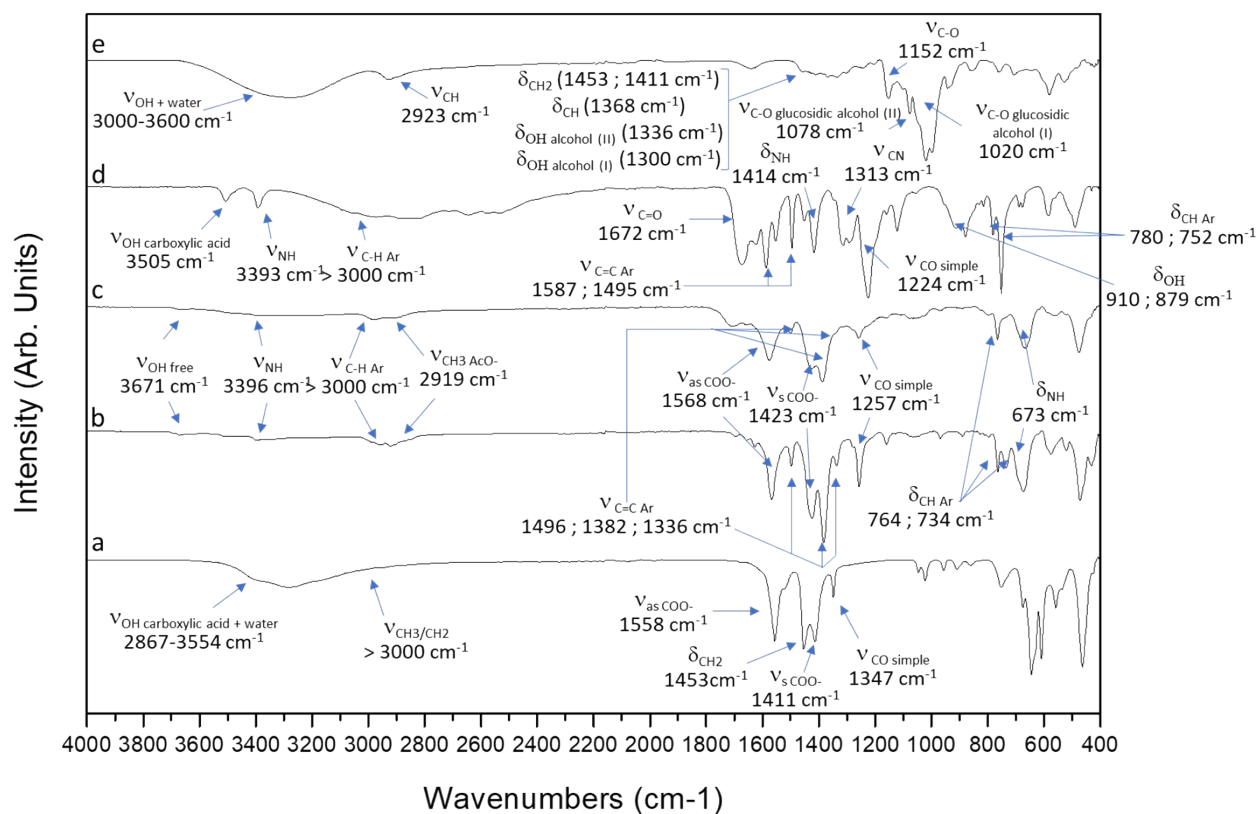

**Figure S16.** FTIR spectra of  $\text{Zr}_6\text{O}_4(\text{OH})_4(\text{CH}_3\text{COO})_{12}$  (a),  $\text{NH}_2\text{-UiO-66}$  (b),  $\text{UiO-66-NH}_2$  synthesized with 1 equivalent  $\gamma\text{-CD}$  with respect to the ligand (c), 2-aminoterephthalic acid (d) and  $\gamma\text{-CD}$  (e).

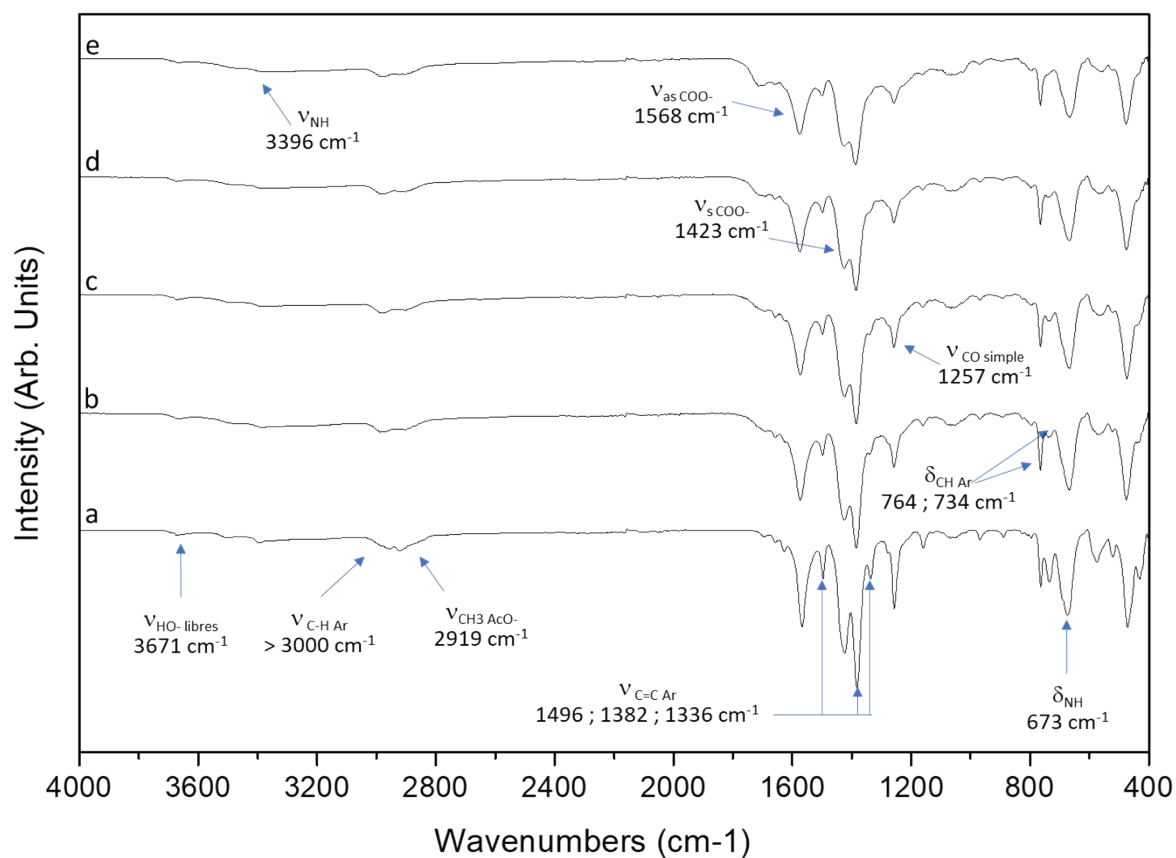

**Figure S17.** FTIR spectra of UiO-66-NH<sub>2</sub> synthesized with  $\gamma$ -CD/ligand molar ratios of 0 (a), 0.25 (b), 0.5 (c), 0.75 (d), and 1 (e).



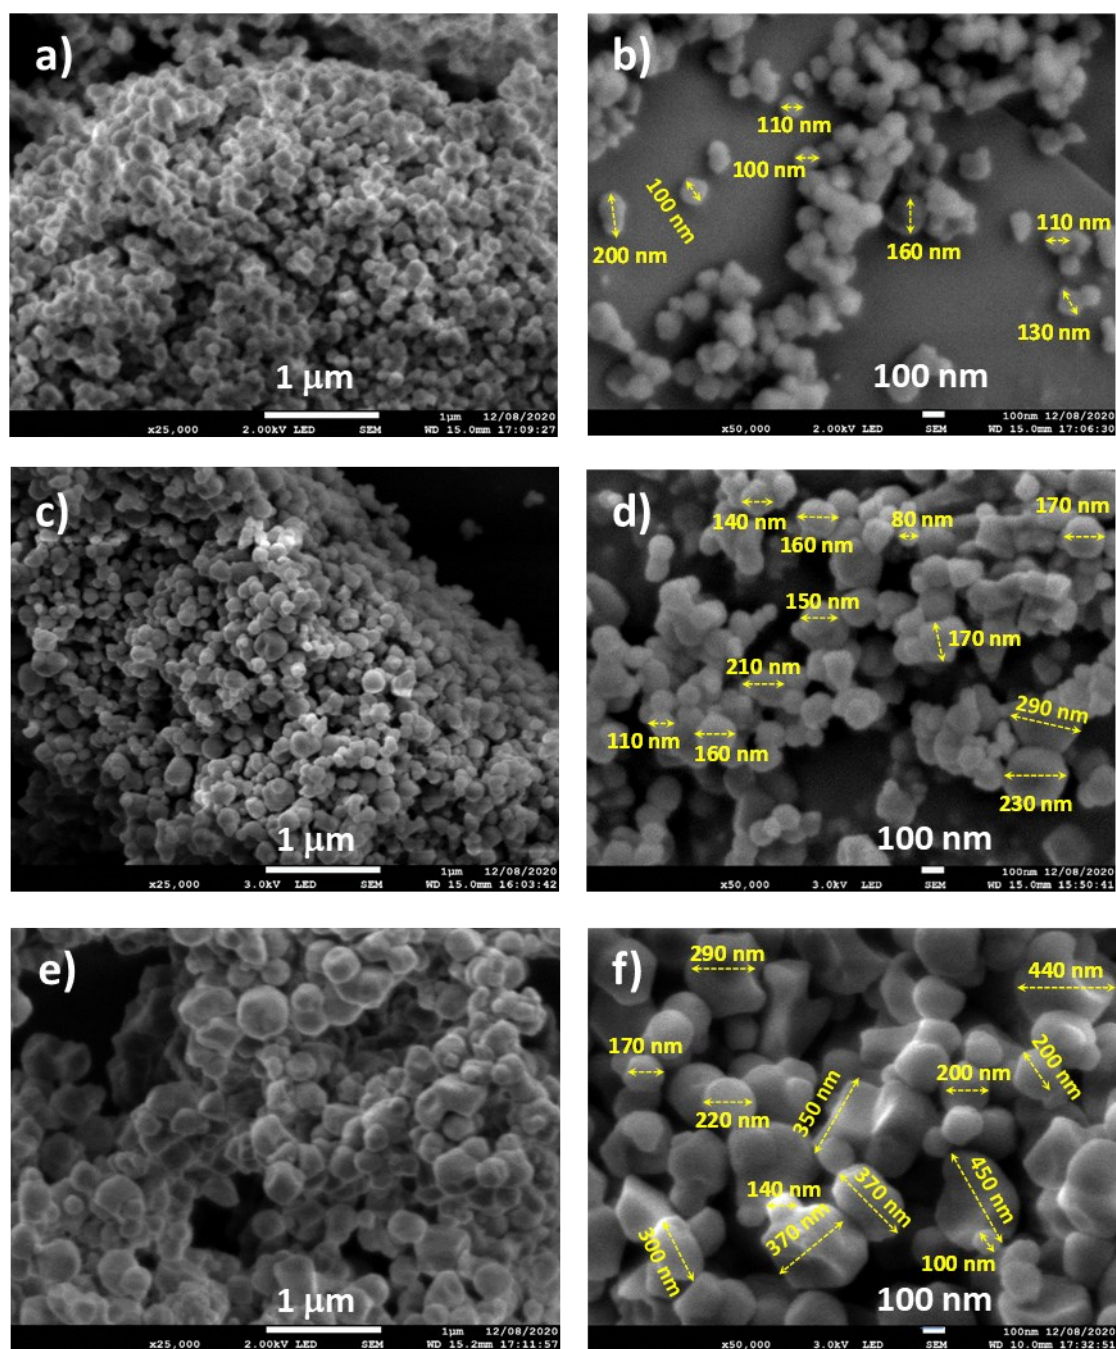

**Figure S18.** Transmission Electron Micrographs of UiO-66-NH<sub>2</sub> synthesized without  $\alpha$ -CD (a and b), with 0.5 equiv.  $\alpha$ -CD with respect to the linker (c and d), and with 0.5 molar equiv. of  $\beta$ -CD with respect to the linker (e and f) with dimensions of crystallites. Magnification: 25,000x (left column) and 50,000x (right column).

a)

|            |                                                                                   |                                                                                   |                                                                                   |                                                                                   |                                                                                   |                                                                                   |                                                                                   |                                                                                    |                                                                                     |                                                                                     |                                                                                     |                                                                                     |
|------------|-----------------------------------------------------------------------------------|-----------------------------------------------------------------------------------|-----------------------------------------------------------------------------------|-----------------------------------------------------------------------------------|-----------------------------------------------------------------------------------|-----------------------------------------------------------------------------------|-----------------------------------------------------------------------------------|------------------------------------------------------------------------------------|-------------------------------------------------------------------------------------|-------------------------------------------------------------------------------------|-------------------------------------------------------------------------------------|-------------------------------------------------------------------------------------|
| Dispersion |  |  |  |  |  |  |  |  |  |  |  |  |
| Time (s)   | <sup>a</sup>                                                                      | 0                                                                                 | 30                                                                                | 60                                                                                | 90                                                                                | 120                                                                               | 150                                                                               | 180                                                                                | 210                                                                                 | 240                                                                                 | 270                                                                                 | 300                                                                                 |

<sup>a</sup> before addition of ground  $H_2$ -BDCNH<sub>2</sub>.

b)

|            |                                                                                   |                                                                                   |                                                                                   |                                                                                   |                                                                                   |                                                                                   |                                                                                   |                                                                                    |                                                                                     |                                                                                     |                                                                                     |                                                                                     |
|------------|-----------------------------------------------------------------------------------|-----------------------------------------------------------------------------------|-----------------------------------------------------------------------------------|-----------------------------------------------------------------------------------|-----------------------------------------------------------------------------------|-----------------------------------------------------------------------------------|-----------------------------------------------------------------------------------|------------------------------------------------------------------------------------|-------------------------------------------------------------------------------------|-------------------------------------------------------------------------------------|-------------------------------------------------------------------------------------|-------------------------------------------------------------------------------------|
| Dispersion |  |  |  |  |  |  |  |  |  |  |  |  |
| Time (s)   | <sup>a</sup>                                                                      | 0                                                                                 | 30                                                                                | 60                                                                                | 90                                                                                | 120                                                                               | 150                                                                               | 180                                                                                | 210                                                                                 | 240                                                                                 | 270                                                                                 | 300                                                                                 |

<sup>a</sup> before addition of a ground mixture of  $H_2$ -BDCNH<sub>2</sub> and  $\alpha$ CD.

c)

|            |                                                                                     |                                                                                     |                                                                                     |                                                                                     |                                                                                     |                                                                                     |                                                                                     |                                                                                      |                                                                                       |                                                                                       |                                                                                       |                                                                                       |
|------------|-------------------------------------------------------------------------------------|-------------------------------------------------------------------------------------|-------------------------------------------------------------------------------------|-------------------------------------------------------------------------------------|-------------------------------------------------------------------------------------|-------------------------------------------------------------------------------------|-------------------------------------------------------------------------------------|--------------------------------------------------------------------------------------|---------------------------------------------------------------------------------------|---------------------------------------------------------------------------------------|---------------------------------------------------------------------------------------|---------------------------------------------------------------------------------------|
| Dispersion |  |  |  |  |  |  |  |  |  |  |  |  |
| Time (s)   | <sup>a</sup>                                                                        | 0                                                                                   | 30                                                                                  | 60                                                                                  | 90                                                                                  | 120                                                                                 | 150                                                                                 | 180                                                                                  | 210                                                                                   | 240                                                                                   | 270                                                                                   | 300                                                                                   |

<sup>a</sup> before addition of a ground mixture  $H_2$ -BDCNH<sub>2</sub> and  $\beta$ CD.

d)

|            |                                                                                     |                                                                                     |                                                                                     |                                                                                     |                                                                                     |                                                                                     |                                                                                     |                                                                                      |                                                                                       |                                                                                       |                                                                                       |                                                                                       |
|------------|-------------------------------------------------------------------------------------|-------------------------------------------------------------------------------------|-------------------------------------------------------------------------------------|-------------------------------------------------------------------------------------|-------------------------------------------------------------------------------------|-------------------------------------------------------------------------------------|-------------------------------------------------------------------------------------|--------------------------------------------------------------------------------------|---------------------------------------------------------------------------------------|---------------------------------------------------------------------------------------|---------------------------------------------------------------------------------------|---------------------------------------------------------------------------------------|
| Dispersion |  |  |  |  |  |  |  |  |  |  |  |  |
| Time (s)   | <sup>a</sup>                                                                        | 0                                                                                   | 30                                                                                  | 60                                                                                  | 90                                                                                  | 120                                                                                 | 150                                                                                 | 180                                                                                  | 210                                                                                   | 240                                                                                   | 270                                                                                   | 300                                                                                   |

<sup>a</sup> before addition of a ground mixture of  $H_2$ -BDCNH<sub>2</sub> and  $\gamma$ CD.

**Figure S19.** Dispersion with time of aqueous solutions containing  $ZrOCl_2 \cdot 8H_2O$  (322.25 mg, 1 mmol), 2-aminoterephthalic acid (181.15 mg, 1 mmol) in a mixture of water/acetic acid (5 mL/5 mL) without  $\alpha$ -CD (a), and in the presence of  $\alpha$ -CD (486 mg, 0.5 mmol) (b),  $\beta$ -CD (568 mg, 0.5 mmol) (c), and  $\gamma$ -CD (649 mg, 0.5mmol) (d).

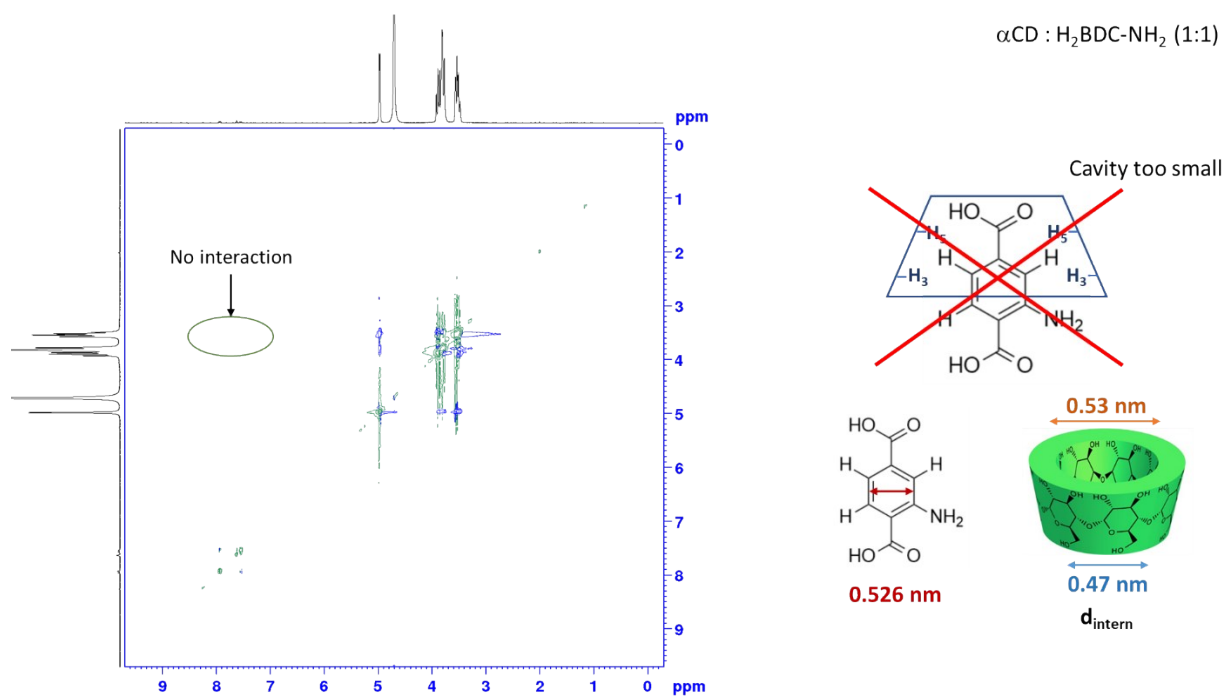

**Figure S20.** 2D T-ROESY NMR spectrum in  $D_2O$  at 25 °C of a 1/1 mixture of  $\alpha$ -CD and  $H_2$ BDC- $NH_2$  (3 mM).

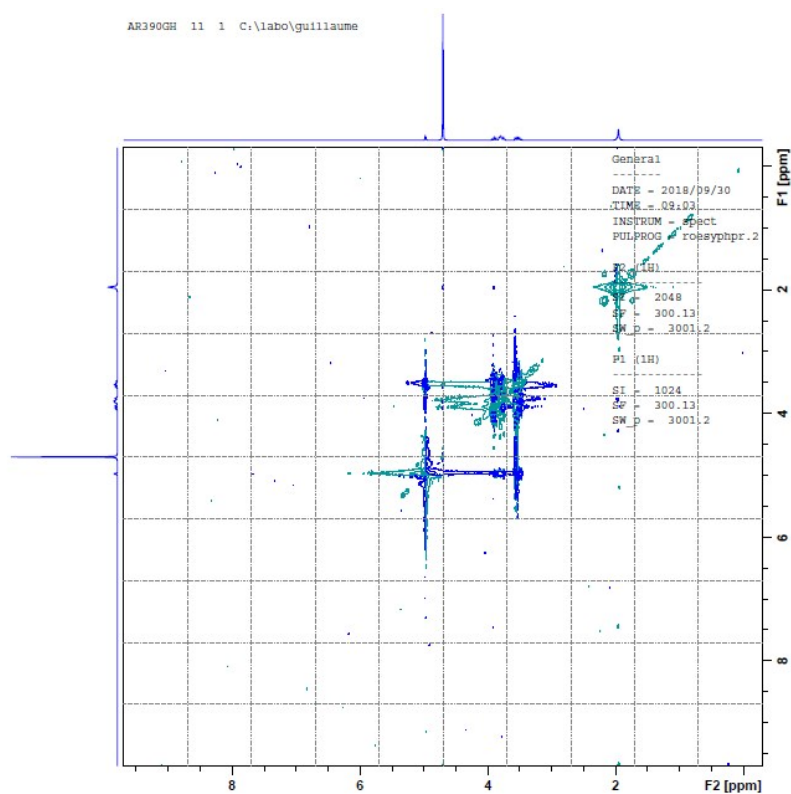

**Figure S21.** 2D T-ROESY NMR spectrum in D<sub>2</sub>O at 25 °C of a 1/1 mixture of  $\alpha$ -CD and Zr-oxyacetate clusters (3 mM).

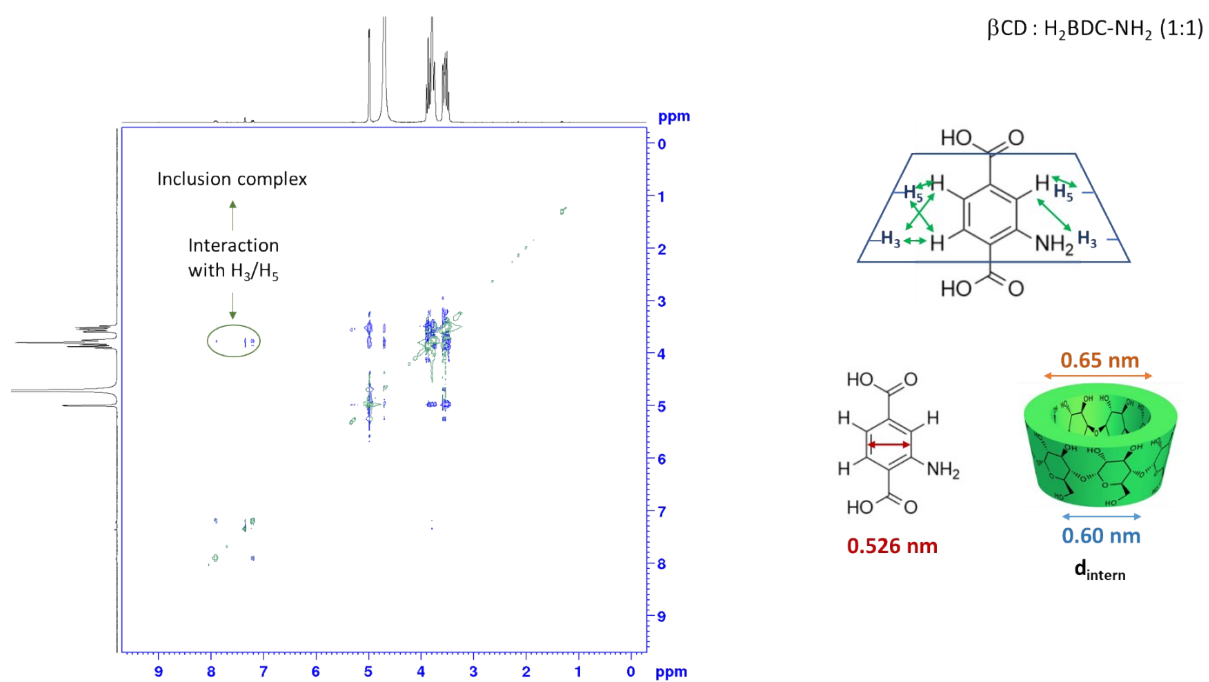

**Figure S22.** 2D T-ROESY NMR spectrum in  $\text{D}_2\text{O}$  at 25 °C of a 1/1 mixture of  $\beta$ -CD and  $\text{H}_2\text{BDCNH}_2$  (3 mM).

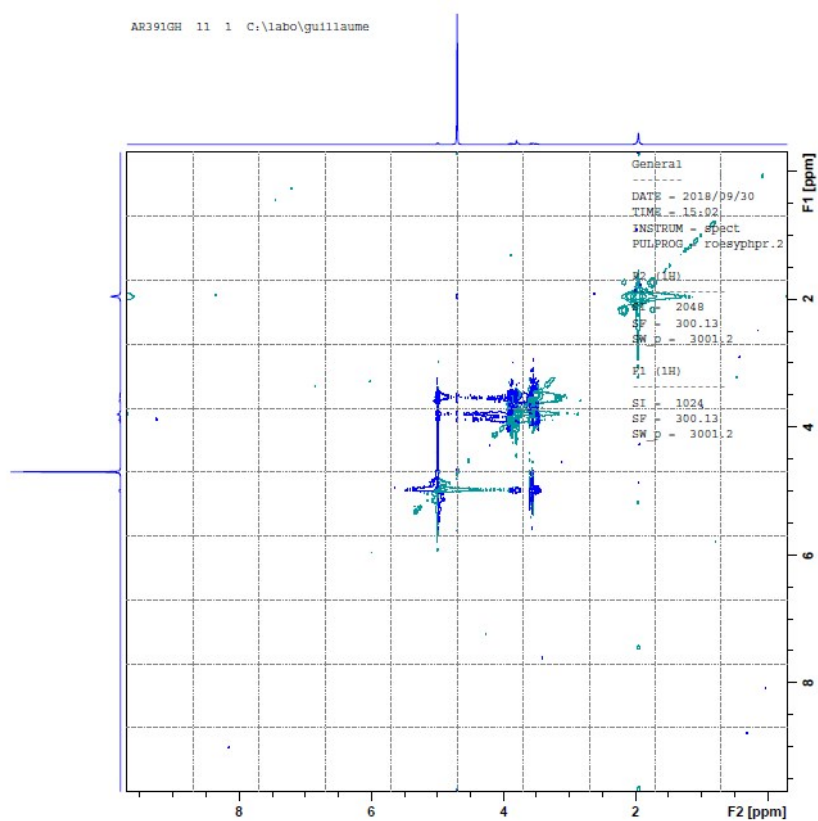

**Figure S23.** 2D T-ROESY NMR spectrum in D<sub>2</sub>O at 25 °C of a 1/1 mixture of  $\beta$ -CD and Zr-oxyacetate clusters (3 mM).

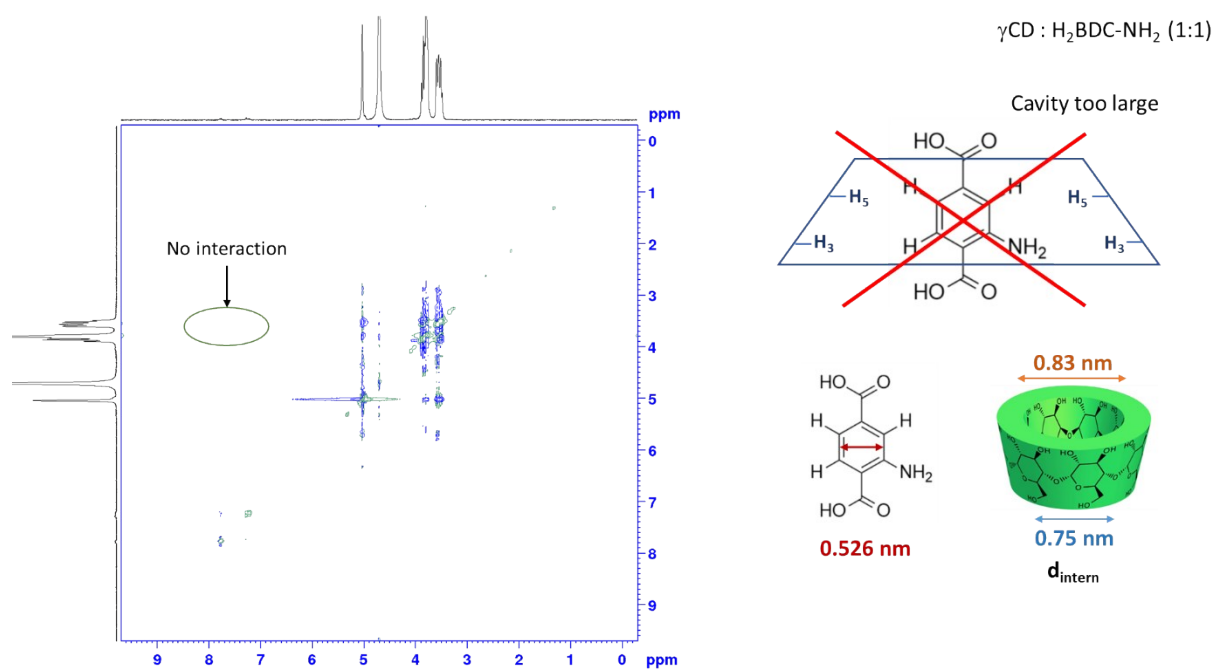

**Figure S24.** 2D T-ROESY NMR spectrum in  $D_2O$  at 25 °C of a 1/1 mixture of  $\gamma$ -CD and  $H_2BDCNH_2$  (3 mM).

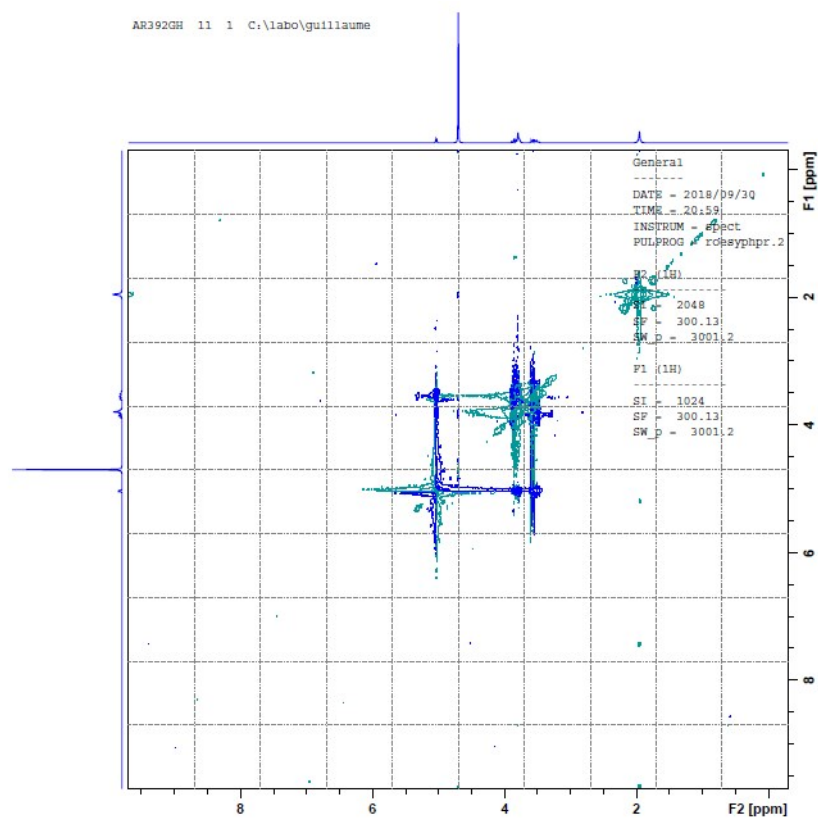

**Figure S25.** 2D T-ROESY NMR spectrum in D<sub>2</sub>O at 25 °C of a 1/1 mixture of  $\gamma$ -CD and Zr-oxyacetate clusters (3 mM).
